# Supplementary material for: Development of a real-time PCR (qPCR) method for the identification of the invasive paddle crab Charybdis japonica (Crustacea, Portunidae)
Source: PeerJ. 2023 Jun 12;11:e15522. doi: 10.7717/peerj.15522 (PMC10269569; doi:10.7717/peerj.15522)
Supplement: Supplemental Information 1 [file peerj-11-15522-s001.xlsx]

## Sheet: Sheet1
Species	Genbank Accession #
C. acuta	EU284143
C. acuta	KX060203
C. acuta	KT365707
C. affinis orientalis	KU737574
C. amboinensis	KX060208
C. anisodon	KX060210
C. annulata	KT365708
C. annulata	KX060206
C. bimaculata	KF570025
C. bimaculata	KF570023
C. bimaculata	KF570009
C. bimaculata	KF570010
C. bimaculata	JX398101
C. bimaculata	KX060215
C. bimaculata	KF570029
C. bimaculata	KF570026
C. bimaculata	KF570020
C. bimaculata	KF570021
C. bimaculata	KF570012
C. bimaculata	KF570016
C. bimaculata	KF570007
C. bimaculata	KF570028
C. bimaculata	KF570017
C. bimaculata	KF570015
C. bimaculata	KF570011
C. bimaculata	KF570019
C. bimaculata	KF570024
C. bimaculata	KF570014
C. bimaculata	KF570022
C. bimaculata	KF570027
C. bimaculata	KF570013
C. bimaculata	KF570018
C. bimaculata	KF570030
C. bimaculata	KF570008
C. bimaculata	KT365709
C. callianassa	KT365710
C. crosnieri	KX060185
C. erythrodactyla	KT365711
C. erythrodactyla	KX060181
C. feriata	KC760153
C. feriata	MF594622
C. feriata	KM977691
C. feriata	KM977705
C. feriata	KM977689
C. feriata	KC760151
C. feriata	KT365712
C. feriata	KP976185
C. feriata	KM977696
C. feriata	KX060192
C. feriata	KM977708
C. feriata	KM977680
C. feriata	KM977688
C. feriata	KM977694
C. feriata	KM977679
C. feriata	KM977704
C. feriata	KM977697
C. feriata	KM977698
C. feriata	KM977707
C. feriata	KM977686
C. feriata	KM977692
C. feriata	EU284140
C. feriata	KP976184
C. feriata	KR186011
C. feriata	MG693204
C. feriata	KM977677
C. feriata	KM977687
C. feriata	KF604888
C. feriata	KM977683
C. feriata	KC760152
C. granulata	KT365713
C. hawaiensis	KT365714
C. hellerii	KX060256
C. hellerii	KX060333
C. hellerii	KX060288
C. hellerii	KX060274
C. hellerii	KX060227
C. hellerii	KX060249
C. hellerii	KX060287
C. hellerii	KX060273
C. hellerii	KX060235
C. hellerii	KF574085
C. hellerii	KX060292
C. hellerii	KX060327
C. hellerii	KX060297
C. hellerii	KX060280
C. hellerii	KX060296
C. hellerii	KX060295
C. hellerii	KT365715
C. hellerii	KX060305
C. hellerii	KX060343
C. hellerii	KX060323
C. hellerii	KX060325
C. hellerii	KX060322
C. hellerii	KX060328
C. hellerii	KX060345
C. hellerii	KX060271
C. hellerii	KX060308
C. hellerii	KX060339
C. hellerii	KX060300
C. hellerii	KX060331
C. hellerii	KX060329
C. hellerii	KX060283
C. hellerii	KX060234
C. hellerii	KX060289
C. hellerii	KX060264
C. hellerii	KX060247
C. hellerii	KX060252
C. hellerii	KX060276
C. hellerii	KX060257
C. hellerii	KX060246
C. hellerii	KX060229
C. hellerii	KP254353
C. hellerii	KX060230
C. hellerii	KX060281
C. hellerii	KX060282
C. hellerii	KX060313
C. hellerii	KX060279
C. hellerii	KX060270
C. hellerii	KX060301
C. hellerii	KX060263
C. hellerii	KX060275
C. hellerii	KX060337
C. hellerii	KX060223
C. hellerii	KX060284
C. hellerii	KX060277
C. hellerii	KX060224
C. hellerii	KX060285
C. hellerii	KX060225
C. hellerii	KX060317
C. hellerii	KX060354
C. hellerii	KX060310
C. hellerii	KX060243
C. hellerii	KX060236
C. hellerii	JX123454
C. hellerii	KX060233
C. hellerii	KX060245
C. hellerii	KX060304
C. hellerii	KX060352
C. hellerii	KX060316
C. hellerii	KX060309
C. hellerii	KX060311
C. hellerii	KX060315
C. hellerii	KX060255
C. hellerii	KX060307
C. hellerii	KX060265
C. hellerii	KX060260
C. hellerii	KX060266
C. hellerii	KX060259
C. hellerii	KX060350
C. hellerii	KX060293
C. hellerii	KX060356
C. hellerii	KX060355
C. hellerii	KX060248
C. hellerii	KX060299
C. hellerii	KX060312
C. hellerii	KX060306
C. hongkongensis	JX398100
C. japonica	HM180501
C. japonica	HM180500
C. japonica	HM180497
C. japonica	HM180499
C. japonica	HM180498
C. japonica	KM987387
C. japonica	KM377982
C. japonica	HM237603
C. japonica	HM237599
C. japonica	KM377975
C. japonica	HM237598
C. japonica	KM377978
C. japonica	HM237601
C. japonica	HM237602
C. japonica	HM237600
C. japonica	KM377977
C. japonica	KM377976
C. japonica	KM377984
C. japonica	KM377983
C. japonica	KM377985
C. japonica	KM377986
C. japonica	EU586120
C. japonica	HM237597
C. japonica	KT365716
C. longicollis	KT365717
C. lucifera	KX381795
C. lucifera	KX381796
C. lucifera	KP317980
C. lucifera	KT365718
C. lucifera	KC760154
C. lucifera	KC928400
C. lucifera	KC928401
C. lucifera	KC760155
C. miles	KX060183
C. natator	KX381797
C. natator	KT365719
C. natator	KX060205
C. natator	KM528125
C. natator	KM528124
C. natator	KF736896
C. natator	JX398102
C. natator	KX381798
C. obtusifrons	KT365720
C. omanensis septentrionalis	KY651228
C. orientalis	KT588225
C. orientalis	KX060212
C. orientalis	KT588226
C. rathbuni	KT365722
C. rathbuni	KX060213
C. riversandersoni	KX060189
C. rufodactylus	KX060186
C. sagamiensis	KX060190
C. sagamiensis	KT365721
C. vadorum	EU284141
C. variegata	KT365723
C. variegata	KX060201
C. variegata	KX060200
C. variegata	KX060202
C. variegata	KJ168053
C. variegata	EU284142
