# Supplementary material for: Development of a real-time PCR (qPCR) method for the identification of the invasive paddle crab Charybdis japonica (Crustacea, Portunidae)
Source: PeerJ. 2023 Jun 12;11:e15522. doi: 10.7717/peerj.15522 (PMC10269569; doi:10.7717/peerj.15522)
Supplement: Supplemental Information 2 [file peerj-11-15522-s002.xlsx]

## Sheet: LOD_LOQ_data
CT	copies
16.9279	4.64898e+06
16.618	4.64898e+06
16.7629	4.64898e+06
17.2399	4.64898e+06
17.2206	4.64898e+06
17.0923	4.64898e+06
17.3074	4.64898e+06
16.9525	4.64898e+06
20.1345	464898
20.247	464898
19.9906	464898
19.8681	464898
19.9962	464898
20.2778	464898
20.3844	464898
20.2293	464898
20.1898	464898
19.9814	464898
19.9323	464898
20.0951	464898
23.4921	46489.8
23.3049	46489.8
23.3509	46489.8
23.3453	46489.8
23.4343	46489.8
23.5148	46489.8
23.5314	46489.8
23.4664	46489.8
23.2719	46489.8
23.4211	46489.8
22.9197	46489.8
23.216	46489.8
26.8597	4648.98
26.6398	4648.98
26.7868	4648.98
26.5266	4648.98
26.642	4648.98
27.0094	4648.98
26.8831	4648.98
26.849	4648.98
26.6894	4648.98
26.5749	4648.98
26.5537	4648.98
26.8586	4648.98
30.493	464.898
29.7883	464.898
30.0262	464.898
30.3284	464.898
30.1092	464.898
30.0529	464.898
31.0653	464.898
30.2723	464.898
30.0105	464.898
30.0374	464.898
29.9752	464.898
29.8678	464.898
33.2005	46.4898
33.2175	46.4898
33.5972	46.4898
33.2609	46.4898
33.4389	46.4898
33.4035	46.4898
33.7587	46.4898
32.9013	46.4898
33.5438	46.4898
33.4388	46.4898
33.4249	46.4898
33.4401	46.4898
36.5753	4.64898
36.1694	4.64898
36.8456	4.64898
36.3091	4.64898
37.2865	4.64898
37.1075	4.64898
36.678	4.64898
36.166	4.64898
36.2055	4.64898
37.79	4.64898
36.577	4.64898
35.7943	4.64898
undertermined	0.0464898
undertermined	0.0464898
undertermined	0.0464898
undertermined	0.0464898
undertermined	0.0464898
undertermined	0.0464898
undertermined	0.0464898
undertermined	0.0464898
undertermined	0.0464898
undertermined	0.0464898
